# Supplementary material for: Single-walled carbon nanotube reptation dynamics in submicron sized pores from randomly packed mono-sized colloids
Source: Royal Society of Chemistry journal article supplement (doi:10.1039/d2sm00305h), 2022-01-01
Supplement: d2sm00305h1.pdf [file d2sm00305h1.pdf]

# **Electronic Supplementary Information for Soft Matter manuscript: Single-walled carbon nanotube reptation dynamics in submicron sized pores from randomly packed mono-sized colloids**

Zhao Tang<sup>1</sup>, Shannon L. Eichmann<sup>1</sup>, Brahim Lounis<sup>2,3</sup>, Laurent Cognet<sup>2,3</sup>, Frederick C. MacKintosh<sup>1,4,5,6</sup>,  
and Matteo Pasquali<sup>1,4,7,\*</sup>

<sup>1</sup>Department of Chemical and Biomolecular Engineering, Rice University, Houston, Texas 77005, USA

<sup>2</sup>Laboratoire Photonique Numérique et Nanosciences, Université de Bordeaux, LP2N, F-33405 Talence, France

<sup>3</sup>Institut d'Optique and CNRS, LP2N, F-33405 Talence, France

<sup>4</sup>Department of Chemistry, Rice University, Houston, Texas 77005, USA

<sup>5</sup>Center for Theoretical Biological Physics, Rice University, TX 77030, Houston, USA

<sup>6</sup>Department of Physics and Astronomy, Rice University, Houston, Texas 77005, USA

<sup>7</sup>Department of Materials Science and NanoEngineering, The Carbon Hub, The Smalley Institute for Nanoscale Science and Technology, Rice University, Houston, Texas 77005, USA

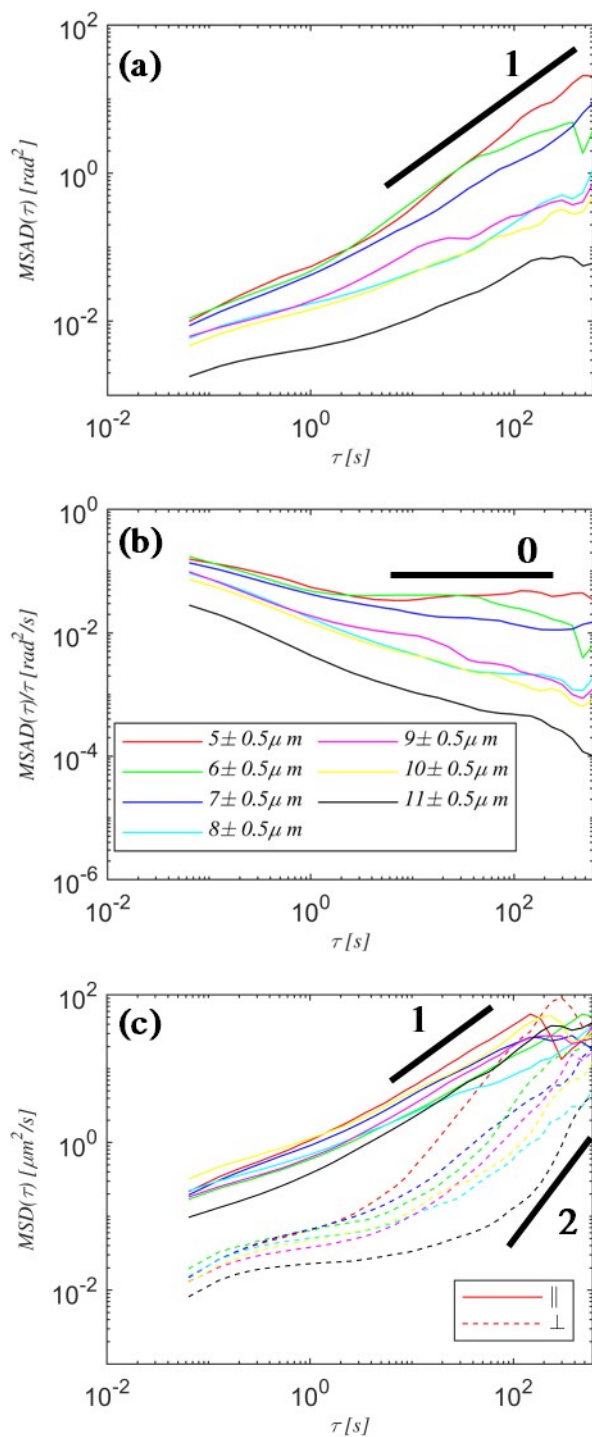

**Figure S 1. Brownian dynamics of length-variant (6,5) chirality SWCNTs in randomly packed-colloid from 2 micron diameter silica colloid.** SWCNT length is obtained from longest contour length of SWCNT backbone points. To minimize pore heterogeneity effect, Brownian dynamics of each SWCNT length comes from 5 to 15 different observations at different pore location. The averaged angular and translational MSD is the arithmetic average of each individual MSD. This Brownian dynamics with wide

SWCNT length range and large number of pore structures show a consistent scaling law with the description in text.
